# Supplementary material
Source: publisher figshare collection journal article supplement (https://frontiersin.figshare.com/ndownloader/files/34920429)
Supplement: Supplementary file 1 [file 34920429]

**Table 2.** P-values from a Mantel test assessing the correlation between a geographical distance matrix and a distance matrix of the residuals of regression models. A regression analysis was performed on each transect separately. The geographical distance matrix was log10-transformed and based on Haversine distance. Significance was determined with 999 permutations. Significance is denoted by bold text.

|  | Transect | | | | | | | | | |
| --- | --- | --- | --- | --- | --- | --- | --- | --- | --- | --- |
|  | 1 | 2 | 3 | 4 | 5 | 6 | 7 | 8 | 9 | 10 |
| Adult abundance | 0.670 | 0.430 | 0.366 | 0.554 | 0.308 | 0.501 | 0.445 | 0.867 | 0.329 | 0.997 |
|
| Juvenile abundance | 0.797 | 0.368 | 0.985 | 0.901 | 0.587 | 0.814 | 0.696 | 0.928 | 0.311 | 0.469 |
|
| Adult richness | 0.668 | 0.423 | 0.377 | 0.574 | 0.299 | 0.471 | 0.509 | 0.887 | 0.361 | 0.993 |
|
| Juvenile richness | 0.148 | 0.072 | 0.896 | 0.611 | **0.004** | 0.871 | 0.328 | 0.863 | 0.826 | 0.240 |
|
